# Supplementary material for: Ammonia-oxidizing archaea are integral to nitrogen cycling in a highly fertile agricultural soil
Source: PubMed Central journal article supplement (PMC9723749; doi:10.1038/s43705-021-00020-4), 2021-06-01
Supplement: 43705_2021_20_MOESM1_ESM.pdf [file 43705_2021_20_MOESM1_ESM.pdf]

1 **Contents of Supplemental Materials**

2

3

4 Supplementary Materials and Methods

Page 2

5

6 Supplementary Results

Page 12

7

## 8 **Supplementary Materials and Methods**

### 9 **Sample collection**

10 Soil samples were collected in December 2017 at the University of Florida Everglades  
11 Research and Education Center located within in the Everglades Agricultural Area (EAA)  
12 near Belle Glade, FL (Supplementary Figure 1). The Everglades Agricultural Area (EAA)  
13 is an area of approximately 3,000 km<sup>2</sup> of farmland representing about 27% of total  
14 historical reach of the Everglades wetlands converted to agricultural land after drainage  
15 between 1900 and 1920 [75, 76]. The soils in the EAA are characterized as organic  
16 histosol with 75% to 85% organic matter content [77] and currently approximately 80% of  
17 the agricultural land is planted with sugarcane [78].

18 We selected four agriculturally managed plots in close proximity differing in crop  
19 cover and fallow period since December 2016 (approximately one year before sampling),  
20 following three years of continuous sugarcane cultivation (plot 2 - 5), and one  
21 unmanaged control plot (plot 1) (Supplementary Figure 1). Following sugarcane harvest  
22 in plot 2 - 5 in November 2016, plot 2 was planted with spinach from January to May  
23 2017, followed by a 28-week fallow period before sampling in the first week of December  
24 2017. Plot 3 was planted with sweet corn from January to May 2017, followed by flooding  
25 and rice cultivation from May until October 2017 and an 8-week fallow period from  
26 October to December 2017. On plot 4 sweet corn was grown from January to May 2017,  
27 also followed by a 28-week fallow period until sampling in December 2017. On plot 5  
28 sugar cane was cultivated for a third consecutive year until harvest in November 2017,

29 one week before sampling. In the fallow plots, growth of weeds was suppressed by  
30 herbicide application and tilling. At the time of sampling all four managed plots were  
31 either fallow (Plot 2 to 4) or sugarcane harvested within one week prior to sampling (plot  
32 5). The unmanaged control plot 1 was covered with a mixed plant community and was  
33 mowed once a year (last in April 2017) for wildfire prevention and neither fertilized, nor  
34 managed with pesticides for at least 30 years.

35 From each plot three composite bulk soil samples were collected between 50 and  
36 200 m apart. Each composite sample consisted of 9 individual 10-cm topsoil cores  
37 collected within a 10 x 10 m square with 5cm diameter plexiglass corers (or sharp spade,  
38 in case plant roots had to be cut). The cores were combined, plant roots and rocks were  
39 removed, and the samples homogenized by sieving and mixing. Composite samples  
40 were divided and immediately frozen on dry ice for molecular analyses or stored on wet  
41 ice for nitrification potential, net nitrification and other soil analyses, respectively.  
42 Samples for soil nutrient analyses (5 g wet weight) were immediately suspended in 45 ml  
43 2M KCl (adjusted to pH 6 with 1mM  $\text{KH}_2\text{PO}_4$ ) and refrigerated until further processing  
44 after return to the laboratory.

#### 45 **Physical and chemical soil analyses**

46 Soil temperature was recorded at the time of sampling in the field. Soil pH was  
47 determined using the soil slurry method. Briefly, ten grams of soil were suspended in 20  
48 ml double deionized water (EMD Millipore Synergy UV) and homogenized by shaking for  
49 1 hour at room temperature before recording pH. Water content was determined by

50 weight loss after drying 20 g fresh soil at 105°C for 24 hours in pre-weighed glass  
51 containers.

52 Soil nutrients ( $\text{NH}_4^+$ ,  $\text{NO}_2^-$  and  $\text{NO}_3^-$ ) were determined colorimetrically following  
53 extraction with 2 M KCl. Briefly, 5 g wet soil was extracted with 45 ml of 2 M KCl solution  
54 (adjusted to pH 6 with 1 mM  $\text{KH}_2\text{PO}_4$  to improve uniformity of extraction and subsequent  
55 assays) by shaking for 1 hour at 50 rpm. Samples were centrifuged for 10 min at 3,000 *g*  
56 and 10 ml supernatant was filtered through a 0.45  $\mu\text{m}$  Nylon filter. Samples were  
57 refrigerated until analysis within 1-5 days.  $\text{NH}_4^+$  and  $\text{NO}_2^-$  were determined using the  
58 salicylate method [79] and sulfanilamide-NED method [80], respectively.  $\text{NO}_3^-$  was  
59 determined following aqueous vanadium reduction using the method by García-Robledo  
60 et al. (2014). Briefly, 150  $\mu\text{L}$   $\text{VCl}_3$  reagent (2% w/v  $\text{VCl}_3$  in 6M HCl) and 1 ml sample of KCl  
61 extract were combined in 1.5-ml reaction tubes, mixed, and incubated at 60 °C for  
62 exactly 100 minutes and immediately chilled on ice. Combined  $\text{NO}_2^-$  and  $\text{NO}_3^-$  was  
63 subsequently determined colorimetrically using the modified sulfanilamide-NED reagent  
64 as described [81].

65

## 66 **Net nitrification and $\text{N}_2\text{O}$ production measurements**

67 Nitrification rates and  $\text{N}_2\text{O}$  production rates were determined in soil microcosms.

68 Microcosms were constructed from 125 ml food-grade glass jars with gas-tight lids

69 (Specialty Bottle, Seattle, WA). Lids were modified with  $\frac{1}{4}$  inch  $\times$   $\frac{1}{4}$  inch brass bulkhead

70 reducers (Ham-Let, Missouri City, TX) and sealed with 5 mm Thermolite plus Septa  
71 (Restek Corporation, Bellefonte, PA). Four days after field sampling, triplicate  
72 microcosms were set up for each sub-plot sample by adding 10 g of fresh field-moist soil  
73 to each microcosm. Microcosms were pre-incubated at near daily average surface soil  
74 temperature of 28 °C in darkness for 48 hours and time series were started by removing  
75 0.5 g soil sample (T0) and equilibration of the headspace to ambient air before sealing  
76 each microcosm. Headspace samples (2 ml) for gas analysis and soil samples (0.5 g) for  
77 nutrient analyses were collected after 24, 48, and 144 h. Nutrients were analyzed using  
78 colorimetric assays as described above and net nitrification rates were calculated from  
79 linear regression of  $\text{NO}_2^- + \text{NO}_3^-$  over time.

80

### 81 **Greenhouse gas analyses**

82 Gas samples collected from microcosms were analyzed directly by manual injection  
83 using a greenhouse gas chromatograph (SRI Instruments, Las Vegas, NV) equipped  
84 with 1-ml sample loop, and FID-methanizer and electron capture detectors, respectively.  
85 Gases were separated on two sequential 2m HayeSep D columns with vent valve  
86 configuration at 80 °C. The instrument was calibrated between 0 and 4,300 ppb  $\text{N}_2\text{O}$ ,  
87 0-18 ppm  $\text{CH}_4$ , and 0- 4,000 ppm  $\text{CO}_2$  using NIST-traceable certified mixed standards of  
88  $\text{CO}_2$ ,  $\text{CH}_4$ , and  $\text{N}_2\text{O}$  in  $\text{N}_2$  (Praxair, Durham, NC) and reproducibility was better than  
89 +/-3%. Carbon mineralization and  $\text{N}_2\text{O}$  production rates were calculated by linear  
90 regression of cumulative gas accumulation over the 144 h incubations.

91

## 92 **Nitrification potentials**

93 On day four after returning from the field, triplicate 1.0-g samples of field-moist soil were  
94 added to 20 ml SFCM media in 50-ml Falcon tubes. The SFCM media contained 1 g l<sup>-1</sup>  
95 NaCl, 0.4 g l<sup>-1</sup> MgCl<sub>2</sub>\*6 H<sub>2</sub>O, 0.1 g l<sup>-1</sup> CaCl<sub>2</sub>\*2H<sub>2</sub>O and 0.5 g l<sup>-1</sup> KCl in double deionized  
96 water (EMD Millipore Synergy UV) [82]. After autoclaving the media was cooled to room  
97 temperature and supplemented with the following sterile stock solutions (per liter): 2 ml  
98 NaHCO<sub>3</sub> (84 g l<sup>-1</sup>), 5 ml KH<sub>2</sub>PO<sub>4</sub> (0.4 g l<sup>-1</sup>), 1ml FeNaEDTA (2.75 g l<sup>-1</sup>), 1 ml modified  
99 non-chelated trace element solution [70]. The medium was buffered at pH 7.2 using ~2  
100 mM sodium bicarbonate and 1 mM NH<sub>4</sub>Cl was added as source of nitrogen. Samples  
101 were vortexed briefly and incubated alongside net nitrification samples at 28 °C.  
102 Samples (1.0 ml) for determination of NO<sub>2</sub><sup>-</sup> + NO<sub>3</sub><sup>-</sup> were collected at 0 h, 24 h, 48 h, and  
103 168 h of incubation. Nutrient concentrations were determined using colorimetric assays  
104 as described above and potential rates were determined from linear regression of NO<sub>2</sub><sup>-</sup> +  
105 NO<sub>3</sub><sup>-</sup> accumulation over the first 48 h of incubation.

106

## 107 **Clone library analysis of archaeal, bacterial and comammox *amoA***

108 Amplicon clone libraries were generated for each plot and ammonia oxidizer group.  
109 Gene fragments of target *amoA* were PCR-amplified using previously described primers  
110 for archaeal *amoA* [41], bacterial *amoA* [42] and comammox *amoA* clade A and clade B  
111 [20]. PCR reactions (25 µL) contained 12.5 µl of GoTaq PCR Mastermix (Promega,  
112 Fitchburg, WI), 1 µl each of forward and reverse primer (0.5 µM final concentration for  
113 archaeal and bacterial *amoA*, 0.25 µM final each for comammox *amoA*) and 2 µl of DNA

114 template (~5ng/μl). Annealing temperatures were optimized empirically for each primer  
115 set to the lowest temperature yielding specific amplicons of expected size. Final PCR  
116 cycling conditions were as follows: Initial denaturation at 94 °C for 5 min, followed by 30  
117 cycles of 30 sec denaturation at 94, 30 seconds at 52 °C annealing (53 °C for  
118 comammox *amoA*), 45 seconds at 72 °C primer extension and 10 min final extension.  
119 Clone library analysis (see below) revealed no clones of comammox *amoA* in amplicons  
120 from Plot 1. PCR reactions and cloning were therefore repeated using amplicons  
121 generated by the qPCR reagents and procedure (see below) with 35 amplification cycles.  
122 All PCR products were electrophoretically separated on 1.5% agarose gels, cut out and  
123 purified by QIAquick Gel Extraction Kit kits (Qiagen, MD, USA). Purified DNA was  
124 quantified by NanoDrop and at least three PCR reactions for each sample were pooled  
125 in equimolar ratios, cloned into TOPO TA PCR2.1 vectors and transformed into OneShot  
126 TOP10 chemically competent *E. coli* following kit instructions (Thermo Fisher Scientific,  
127 MA, USA), except ligation reactions were carried out overnight for best cloning efficiency.  
128 Following blue-white screening and PCR-checking, 95 clones per library were grown up  
129 overnight in Lysogeny broth (LB) plus 40 μg/ml kanamycin. Plasmids were extracted  
130 using the QIAprep Spin Miniprep Kit (Qiagen, MD, USA) and inserts were sequenced at  
131 Eurofins Genomics (Huntsville, AL). Sequences were trimmed using sangerseqR  
132 package [43] and then imported into ARB program [44], aligned and manually checked.  
133 An initial ARB-formatted alignment of comammox *amoA* gene sequences was provided  
134 by Pjevac et al. [20] and amended with new sequences obtained from NCBI genbank.  
135 Archaeal and bacterial *amoA* gene ARB databases were built from sequences obtained  
136 from NCBI genbank. Neighbor-joining and Maximum-likelihood phylogenetic trees were

137 calculated in ARB using the DNA distance method with Jukes-Cantor correction and  
138 RAxML algorithm with GTRGAMMA-25 rate distribution model and rapid hill climbing  
139 algorithm, respectively, based on 595, 453, and 383 nucleotide positions for archaeal,  
140 bacterial, and comammox *amoA*, respectively. QIIME 1.9.1 [45] was employed to group  
141 sequences into operational taxonomic units (OTU) with a range of sequence similarity  
142 from 85%-99% relative to known AOA and AOB and comammox strains, and 96%, 97%  
143 and 94% sequence similarity were chosen for archaeal, bacterial, and comammox *amoA*,  
144 respectively, and applied to phylogenetic trees shown.

145

#### 146 **16S rRNA gene amplicon library preparation and sequencing**

147 PCR amplifications, library preparations and DNA sequencing were conducted at the  
148 Environmental Sample Preparation and Sequencing Facility (ESPSF) at Argonne  
149 National Laboratory. PCR products for 16S rRNA gene amplicon libraries were  
150 generated following Earth Microbiome Project protocols [46]. The V4 region of the 16S  
151 rRNA gene was amplified using primers 515F [47] and 806R [48]. Forward primer  
152 included sequencing adapter sequences and reverse primer contained the twelve base  
153 barcode sequence. PCR reactions contained 9.5  $\mu$ L certified DNA-Free PCR Water  
154 (MoBio, USA), 12.5  $\mu$ L 2x AccuStart II PCR ToughMix (QuantaBio, Beverly, MA), 1  $\mu$ L  
155 200 pM forward primer, 200 pM Golay barcode-tagged reverse primer, and 1  $\mu$ L  
156 template DNA. PCR protocol included denaturation at 94 °C for 3 minutes followed by 35  
157 cycles at 94 °C for 45 s, 50 °C for 60 s, and 72 °C for 90 s; with a final extension of 10  
158 min at 72 °C. PCR products were quantified using PicoGreen (Invitrogen, Carlsbad, CA)  
159 in a 96-well microplate reader (Infinite® 200 PRO, Tecan, Grödig, Austria). PCR



160 products were pooled in equimolar amounts and purified using AMPure XP Beads  
161 (Beckman Coulter, Brea, CA), quantified by Qubit DNA quantification kit (Invitrogen,  
162 Carlsbad, CA), diluted to 2 nM, denatured, and then diluted to 6.75 pM final  
163 concentration with 10% PhiX spike. Sequencing was performed on a Illumina MiSeq  
164 instrument using 150 cycle MiSeq Reagent kit v3 (Illumina, San Diego, Ca).

165 Amplicon sequences were demultiplexed on the instrument. Subsequent initial  
166 sequence analyses including barcode removal, quality filtering, trimming, read merging  
167 and chimera screening were conducted using DADA2 [49] with default settings  
168 implemented in the QIIME 2 package [50]. The representative sequences and amplicon  
169 sequence variants (ASV) table generated in the DADA2 denoising step served as inputs  
170 for subsequent taxonomic assignments via qiime feature-classifier using sklearn  
171 algorithm against the Silva database version 132 [51]. ASV sequences were imported  
172 into ARB, manually aligned to 16S rRNA gene reference sequences (> 1,400 nt).  
173 Backbone phylogenetic trees were calculated for *Thaumarchaeota* and *Nitrospira* sp.,  
174 respectively, using maximum-likelihood method aaAxML rate distribution model and  
175 maximum base frequency filters for *Archaea* and *Nitrospirae*, respectively. Short  
176 sequences were inserted into the trees using the “quick add sequences by parsimony”  
177 option in ARB using respective filters and position limits according to *E. coli* position 534  
178 and 786.

179 Shannon Index, Observed\_OTUs, Faith’s phylogenetic diversity and Bray-Curtis  
180 dissimilarity matrices were calculated using “qiime diversity core-metrics-phylogenetic”  
181 command in Qiime 2 after rarefaction to 25,900 sequences (whole microbial community  
182 16S rRNA) and 780 sequences (thaumarchaeal 16S rRNA). The Bray-Curtis distance

183 matrix of thaumarchaeal *amoA* was calculated using the `vegdist` function of the `vegan`  
184 package (<https://CRAN.R-project.org/package=vegan> [52]) implemented in R, after  
185 rarefying to 53 sequences. Subsequent principal coordinate analyses (PCoA), canonical  
186 correspondence analyses (CCA), and distance-based redundancy analysis (dbRDA)  
187 were run by using the `pcoa`, `cca`, and `capscale` functions in `vegan`, respectively.  
188 Significance of differences between plots were tested by the `adonis` function with 999  
189 permutations in `vegan`. Pearson correlations and ANOVA comparison of means were  
190 conducted in base R version 3.6.3 [53].

191

### 192 **Quantification of *amoA* gene copy numbers by quantitative PCR**

193 Ammonia monooxygenase subunit A (*amoA*) genes of archaeal, betaproteobacterial,  
194 and comammox *Nitrospira* were quantified by real-time PCR (qPCR) using primers for  
195 archaeal *amoA* [41], bacterial *amoA* [42] and comammox *amoA* clade A and clade B [20]  
196 using the QuantiTect SYBR® Green qPCR kit (Qiagen, Germantown, MD) in a Bio-Rad  
197 IQ5 real-time PCR system (Bio-Rad, Hercules, CA). The 20 µL PCR reactions contained  
198 10 µl of QuantiTect SYBR® Green Master Mix, 1 µl each of forward and reverse primer  
199 (10 µM for archaeal and bacterial *amoA*, 5 µM each for combined comammox *amoA*),  
200 and 2 µl of DNA template (5 ng/µl). Genomic DNA isolated from *Nitrososphaera*  
201 *viennensis* strain EN 76 [10] and *Nitrospira briensis* Nsp10 was used as qPCR  
202 standards for archaeal and betaproteobacterial *amoA*, respectively. A comammox *amoA*  
203 standard was made from a comammox *amoA* clone plasmid carrying the most abundant  
204 sequence type found in our samples (OTU11). The plasmid was linearized by overnight  
205 restriction digest with NotI (New England Biolabs, MA, USA), purified by DNA

206 precipitation, and complete digestion confirmed by gel electrophoresis. All qPCR  
207 standards were stored in aliquots at -80 °C until use.

208       Annealing temperatures for all qPCR assays were optimized in temperature  
209 gradients using soil DNA samples and serial dilutions of standards ( $10$ - $10^6$  *amoA*  
210 copies/ul). The optimized PCR cycling conditions were as follows: Initial denaturation at  
211 94 °C for 5 min, 40 cycles of 45 sec denaturation at 94 °C, 30 seconds annealing at  
212 54 °C, 58 °C, and 53 °C for archaeal *amoA*, bacterial *amoA*, and comammox *amoA*,  
213 respectively, and 45 seconds at 72 °C extension, followed by a detection step 15  
214 seconds at 80 °C. Melting curve analysis was run in 0.5 °C increments every 10 s  
215 between 60 °C and 95 °C. PCR products were checked by gel electrophoresis. Gene  
216 copy numbers were calculated and transformed to copies/g dry weight soil. Under the  
217 given qPCR conditions, the PCR amplification efficiencies were 86% for archaeal *amoA*,  
218 90% for bacterial *amoA* and 96% for comammox *amoA*.

## 219 **Supplementary Results**

### 220 **Soil physicochemical characterization**

221 In order to examine the response of soil microbial communities to agricultural crops  
222 and management we examined four soil plots with different recent crop cover and an  
223 unmanaged control plot in close proximity to each other in the Everglades Agricultural  
224 Area (Supplementary Figure 1).

225 Soil moisture ranged from of  $0.39 \pm 0.01$  to  $0.47 \pm 0.01$  % (w/w) with significantly  
226 higher values in plots 3 and 5 ( $P < 0.05$ ). As expected, following long-term agricultural  
227 management pH was significantly higher ( $\text{pH} \geq 7$ ) in agricultural plots than in the native  
228 plot 1 ( $\text{pH} < 6.0$ ;  $P < 0.05$ ) and slightly increasing from plot 2 to 5.

229 High concentrations of  $\text{NO}_3^-$ -N ( $43.8 \pm 9.35$  to  $116.10 \pm 70.31$   $\mu\text{g/g}$ ) were observed in  
230 plots 1 to 4, with highest  $\text{NO}_3^-$ -N concentrations in plots with significant fallow periods  
231 (Figure 1A). In contrast, plot 5 from which sugar cane had been harvested only about  
232 one week before sampling,  $\text{NO}_3^-$ -N of  $2.99 \pm 0.49$   $\mu\text{g/g}$ , was approximately 15-time lower  
233 than in unmanaged plot 1 and 23- to 38-fold lower than in the plots with significant fallow  
234 periods ( $P < 0.05$ ; Figure 1).

235 Concentrations of  $\text{NH}_4^+$ -N ( $5.66 \pm 0.43$  to  $8.56 \pm 0.68$   $\mu\text{g/g}$ ) were slightly higher in  
236 plots with recent plant cover. However, there were no statistically significant differences  
237 between plots. Total and available P followed similar trends. TP ranged from  $1.20 \pm 0.04$   
238 g/kg in plot 1 up to  $1.93 \pm 0.15$  g/kg in plot 2, with plot 3 showing only slightly higher  
239 values than plot 1, and plot 4 and 5 showing intermediate concentrations). Available P  
240 ranged from  $22.00 \pm 3.61$  mg/kg in plot 1 to  $117.67 \pm 8.14$  mg/kg in plot 2. Dissolved  
241 organic carbon (DOC) concentrations were highest in plot 1 ( $5871.01 \pm 200.50$  mg/kg)

242 and plot 5 ( $4784.15 \pm 99.67$  mg/kg) and slightly lower in plot 2-4 ( $2911.97 \pm 133.57$   
243 mg/kg to  $4040.19 \pm 193.00$  mg/kg) (Supplementary Figure 2). Total organic carbon (TOC)  
244 was highest in the unmanaged plot ( $82.72 \pm 1.09$  %) and between 5.31 and 12.56%  
245 lower in the managed plots. Altogether, the results suggested that the type of plant cover  
246 and length of fallow periods significantly influenced soil physicochemical properties.

247

### 248 **Overall microbial community composition**

249 Among the total 990,311 high-quality paired-end sequences ( $66,011 \pm 23,456$   
250 sequences per sample from the 15 EAA soil samples), a total of 12,179 ASV's were  
251 identified and phylogenetically affiliated with 2,420 distinct species-level taxa within 55  
252 bacterial and archaeal phyla. *Archaea* ranged between  $2.48 \pm 0.55\%$  of all sequences in  
253 plot 1 and  $6.65 \pm 0.85\%$  in plot 2, with intermediate numbers around 4.0% and no  
254 significant differences between plots 3 – 5. Non-thaumarchaeotal sequences constituted  
255 a minor fraction (range  $0.06 \pm 0.81\%$  to  $0.37 \pm 0.86\%$ ). Conversely, bacterial sequences  
256 ranged between  $93.3 \pm 1.0\%$  in plot 2 and  $97.5 \pm 0.7\%$  in plot 1. As expected, only a  
257 marginal fraction of sequences (0.01%) was affiliated with Eukaryotes in all samples.  
258 Overall, bacterial sequences associated with 11 major phyla commonly found in soil:  
259 *Proteobacteria* (averaging 32.5% of all sequences in all plots), *Acidobacteria* (17.4%),  
260 *Actinobacteria* (12.5%), *Chloroflexi* (7.4%), *Planctomycetes* (5.0%), *Bacteroidetes*  
261 (4.4%), *Gemmatimonadetes* (3.4%), *Verrucomicrobia* (2.9%), *Firmicutes* (2.9%),  
262 *Rokubacteria* (1.9%), *Nitrospirae* (1.3%). Sequences associated with all other less  
263 frequent phyla totaled 4.2%.

264

265 **Supplementary References**

- 266  
267 75. Lodge TE (2016). *The Everglades Handbook: Understanding the ecosystem*.  
268 CRC Press: Boca Raton.
- 269  
270 76. Entry JA, Gottlieb AD, Jayachandran K, Ogram A (eds) (2015). *Microbiology of*  
271 *the Everglades ecosystem*. CRC Press: Boca Raton.
- 272  
273 77. Snyder G (2005). Everglades agricultural area soil subsidence and land use  
274 projections. *Soil Crop Science Society Florida Proceedings*. **64**: 44-51.
- 275  
276 78. Kadlec RH (2009). Everglades and agriculture in South Florida. In: Maltby E,  
277 Barker T (eds). *The Wetlands Handbook*. Wiley-Blackwell.
- 278  
279 79. Bower CE, Holm-Hansen T (1980). A salicylate–hypochlorite method for determining  
280 ammonia in seawater. *Can J Fish Aquat Sci*. **37**: 794-798.
- 281  
282 80. Grasshoff K, Kremling K, Erhard M (1999). *Methods of seawater analysis*, 3 edn.  
283 Wiley-VCH.
- 284  
285 81. García-Robledo E, Corzo A, Papaspyrou S (2014). A fast and direct  
286 spectrophotometric method for the sequential determination of nitrate and nitrite  
287 at low concentrations in small volumes. *Mar Chem*. **162**: 30-36.
- 288  
289 82. de la Torre JR, Walker CB, Ingalls AE, Könneke M, Stahl DA (2008). Cultivation of  
290 a thermophilic ammonia oxidizing archaeon synthesizing crenarchaeol. *Environ*  
291 *Microbiol*. **10**: 810-818.
- 292
